# Supplementary material for: Chiral mixed matrix membranes with the (S,S)-Whelk-O®1 selector supported on polyethersulfone/MCM-41
Source: Royal Society of Chemistry journal article supplement (doi:10.1039/d4nj00163j), 2024-01-01
Supplement: d4nj00163j1.pdf [file d4nj00163j1.pdf]

1 **Supporting information for**

2

3 **Title: Chiral mixed matrix membrane with (S,S)- Whelk-O®1 selector supported**  
4 **on polyethersulfone/MCM-41**

5 **Author names and affiliations:**

6 Priscila Vedovello<sup>1,2,\*</sup> (0000-0002-1934-0393)

7 Carla Fernandes<sup>2,3</sup> (0000-0003-0940-9163)

8 Maria Elizabeth Tiritan<sup>2,3,4</sup> (0000-0003-3320-730X)

9 Caio Marcio Paranhos<sup>1</sup> (0000-0002-2261-0585)

10

11 *<sup>1</sup>CDMF, Polymer Laboratory, Department of Chemistry, Federal University of São*  
12 *Carlos, 13565-905, São Carlos, São Paulo, Brazil*

13 *<sup>2</sup>Laboratory of Organic and Pharmaceutical Chemistry, Department of Chemical*  
14 *Sciences, Faculty of Pharmacy, University of Porto, 4050-313, Porto, Portugal*

15 *<sup>3</sup>Interdisciplinary Centre of Marine and Environmental Research (CIIMAR), 4050-208,*  
16 *Matosinhos, Portugal*

17 *<sup>4</sup>TOXRUN – Toxicology Research Unit, University Institute of Health Sciences, CESPU,*  
18 *CRL, 4585-116 Gandra, Portugal*

19

20 **\*Corresponding authors:**

21 **Maria Elizabeth Tiritan**

22 Full postal address: Rua de Jorge Viterbo Ferreira, n.º. 228, 4050-313 Porto – Portugal

23 **Priscila Vedovello**

24 Full postal address: CDMF, Polymer Laboratory, Department of Chemistry, Federal  
25 University of São Carlos, 13565-905, São Carlos, São Paulo, Brazil

26

27

28

29

30

31 **S1. Validation of the LC method for evaluation of the membranes**

32

33 The validation of the analytical method was performed according to parameters  
34 established by *International Conference on Harmonization of Technical Requirements*  
35 *for Registration of Pharmaceuticals for Human Use (ICH)* <sup>1</sup>.

36 **A. Validation with (R)-6MeX and (S)-6MeX enantiomers:**

37 Seven standard solutions with different concentrations of (R)- 6MeX and (S)- 6MeX  
38 enantiomers were prepared for calibration curve (Table S1). Calibration curves is  
39 presented in Figure S1 . The calibration curve was obtained by plotting the concentration  
40 of the (R)- 6MeX and (S)- 6MeX enantiomers versus the area of the respective signals.  
41 The value of the linear correlation coefficient ( $r^2$ ) was 0.99778 and 0.99476, respectively.

42 Table S1 – Concentrations of standard solutions and the values obtained for the areas.

| Concentrations of 6MeX ( $\mu\text{mol L}^{-1}$ ) | Area<br>(S)- 6MeX     | Area<br>(R)- 6MeX     |
|---------------------------------------------------|-----------------------|-----------------------|
| 5                                                 | 6.3347 $\pm$ 0.0310   | 7.0124 $\pm$ 0.0073   |
| 10                                                | 9.8670 $\pm$ 0.1066   | 11.3273 $\pm$ 0.1104  |
| 25                                                | 25.2259 $\pm$ 0.0219  | 29.6362 $\pm$ 0.1063  |
| 50                                                | 51.1752 $\pm$ 0.0577  | 61.0830 $\pm$ 0.5818  |
| 75                                                | 77.4371 $\pm$ 0.0890  | 74.9468 $\pm$ 0.1967  |
| 100                                               | 92.2077 $\pm$ 0.0512  | 113.1189 $\pm$ 0.0946 |
| 125                                               | 106.5526 $\pm$ 0.2277 | 123.5150 $\pm$ 5.0332 |

43

44 The linearity of the method was determined from analytical curves presented above, each  
45 showing 7 concentrations between 5 and 125  $\mu\text{mol L}^{-1}$  of the 6MeX enantiomers diluted  
46 in EtOH. Repeatability or precision was assessed using the calculation of relative standard  
47 deviation (RSD):

$$RSD = \frac{SD}{MCD} \times 100$$

48

Eq.1

49 where, SD is the standard deviation and MCD, the mean concentration determined.

50 Accuracy was determined through concentration values determined experimentally,

51 compared to theoretical concentration, according to equation 2.

$$52 \quad Accuracy = \frac{MCD}{TC} \times 100 \quad Eq.2$$

53 where TC is the theoretical concentration.

54 To determine the intra-day and inter-day precision and accuracy, three standards solution

55 (different from the concentration of calibration levels) *n* of the pure enantiomers in

56 concentrations of 18, 65, and 85  $\mu\text{mol mL}^{-1}$ , in triplicate, were analyzed (Table S2 and

57 Table S3). Accuracy was determined using experimentally determined concentration

58 values, compared to the theoretical concentration (Table S3).

59 Table S2 - Relative standard deviation (RSD) values for the concentrations of the (*R*)-  
60 6MeX and (*S*)- 6MeX enantiomers determined for precision evaluation.

|                   | TC ( $\mu\text{mol L}^{-1}$ ) | Day 1<br>RSD (%) | Day 2<br>RSD (%) | Day 3<br>RSD (%) | Inter-days<br>RSD (%) |
|-------------------|-------------------------------|------------------|------------------|------------------|-----------------------|
| <i>(S)</i> - 6MeX | 18                            | 0.4625           | 1.2674           | 0.6858           | 8.5365                |
|                   | 65                            | 0.0483           | 0.1335           | 1.3313           | 4.1730                |
|                   | 85                            | 0.5691           | 0.0475           | 0.0823           | 7.8565                |
| <i>(R)</i> - 6MeX | 18                            | 0.3395           | 0.4972           | 0.5022           | 3.7084                |
|                   | 65                            | 0.2585           | 0.2031           | 0.6158           | 6.2415                |
|                   | 85                            | 0.1212           | 0.1886           | 0.9161           | 3.4871                |

61

62 Table S3 – Intra-day and inter-day accuracy assessment of (*R*)- 6MeX and (*S*)- 6MeX  
63 enantiomers.

|                   | TC<br>( $\mu\text{mol L}^{-1}$ ) | Day 1<br>% de Rec. | Day 2<br>% de Rec. | Day 3<br>% de Rec. | Inter-days<br>% de Rec. |
|-------------------|----------------------------------|--------------------|--------------------|--------------------|-------------------------|
| <i>(S)</i> - 6MeX | 18                               | 91.9806            | 86.5883            | 88.9849            | 89.1846                 |
|                   | 65                               | 113.1920           | 106.6311           | 116.0136           | 111.9456                |
|                   | 85                               | 97.4197            | 94.8712            | 97.4595            | 96.5835                 |
| <i>(R)</i> - 6MeX | 18                               | 116.4247           | 114.9777           | 116.1193           | 115.8406                |

|    |         |         |          |          |
|----|---------|---------|----------|----------|
| 65 | 94.5714 | 95.8898 | 94.5369  | 94.9994  |
| 85 | 95.0604 | 94.7815 | 114.8341 | 101.5587 |

64

65 The RSD values determined between days were all below the value recommended  
66 by the Standard, which is a maximum of 10%, so the method can be considered accurate.  
67 The accuracy varied from 89 a 117%, being within the specifications established by ICH.

68

69 **B. Validation with (*R*)-NPX and (*S*)-NPX enantiomers:**

70 Seven standard solutions with different concentrations of (*R*)-NPX and (*S*)-NPX  
71 enantiomers were prepared for calibration curve (Table S4). Calibration curves is  
72 presented in Figure S2 . The calibration curve was obtained by plotting the concentration  
73 of the (*R*)-NPX and (*S*)-NPX enantiomers versus the area of the respective signals. The  
74 value of the linear correlation coefficient ( $r^2$ ) was 0,99876 and 0,9946, respectively.

75 Table S4 – Concentrations of standard solutions and the values obtained for the areas.

| Concentrations of NPX ( $\mu\text{mol L}^{-1}$ ) | Area<br>( <i>S</i> )-NPX | Area<br>( <i>R</i> )-NPX |
|--------------------------------------------------|--------------------------|--------------------------|
| 5                                                | 0.5624 $\pm$ 0.0072      | 0.4896 $\pm$ 0.0044      |
| 10                                               | 1.1229 $\pm$ 0.0051      | 1.2456 $\pm$ 0.0126      |
| 25                                               | 3.4171 $\pm$ 0.0050      | 3.0025 $\pm$ 0.0119      |
| 50                                               | 7.4636 $\pm$ 0.0055      | 6.6345 $\pm$ 0.0226      |
| 75                                               | 11.3792 $\pm$ 0.1080     | 10.7693 $\pm$ 0.0148     |
| 100                                              | 13.9502 $\pm$ 0.0355     | 13.6395 $\pm$ 0.0248     |
| 125                                              | 17.2481 $\pm$ 0.0152     | 17.2430 $\pm$ 0.0157     |

76

77 The linearity of the method was determined from analytical curves presented above, each  
78 showing 7 concentrations between 5 and 125  $\mu\text{mol L}^{-1}$  of the NPX enantiomers diluted in  
79 EtOH. Repeatability or precision was assessed using the calculation of relative standard  
80 deviation (RSD). Accuracy was determined through concentration values determined  
81 experimentally, compared to theoretical concentration, according to equation 2.

82 To determine the intra-day and inter-day precision and accuracy, three standards solution  
 83 (different from the concentration of calibration levels) *n* of the pure enantiomers in  
 84 concentrations of 18, 65, and 85  $\mu\text{mol mL}^{-1}$ , in triplicate, were analyzed (Table S5 and  
 85 Table S6). Accuracy was determined using experimentally determined concentration  
 86 values, compared to the theoretical concentration (Table S6).

87 Table S5 - Relative standard deviation (RSD) values for the concentrations of the (*R*)-  
 88 NPX and (*S*)-NPX enantiomers determined for precision evaluation.

|                 | TC ( $\mu\text{mol L}^{-1}$ ) | Day 1<br>RSD (%) | Day 2<br>RSD (%) | Day 3<br>RSD (%) | Inter-days<br>RSD (%) |
|-----------------|-------------------------------|------------------|------------------|------------------|-----------------------|
| <i>(S)</i> -NPX | 18                            | 0.4011           | 0.4089           | 0.9184           | 1.2430                |
|                 | 65                            | 0.9576           | 0.0495           | 0.0381           | 7.4994                |
|                 | 85                            | 0.1300           | 0.1372           | 0.0384           | 9.8909                |
| <i>(R)</i> -NPX | 18                            | 1.3270           | 0.1759           | 0.2011           | 7.1999                |
|                 | 65                            | 0.1719           | 0.1027           | 0.0204           | 6.1492                |
|                 | 85                            | 0.2663           | 0.0317           | 0.0522           | 4.2578                |

89

90 Table S6 – Intra-day and inter-day accuracy assessment of (*R*)-NPX and (*S*)-NPX  
 91 enantiomers.

|                 | TC<br>( $\mu\text{mol L}^{-1}$ ) | Day 1<br>% de Rec. | Day 2<br>% de Rec. | Day 3<br>% de Rec. | Inter-days<br>% de Rec. |
|-----------------|----------------------------------|--------------------|--------------------|--------------------|-------------------------|
| <i>(S)</i> -NPX | 18                               | 75.6418            | 75.5530            | 77.2349            | 76.1432                 |
|                 | 65                               | 81.4935            | 92.0835            | 80.6976            | 84.7582                 |
|                 | 85                               | 82.7094            | 99.1206            | 85.3641            | 89.0647                 |
| <i>(R)</i> -NPX | 18                               | 81.7122            | 91.5098            | 80.3566            | 84.5262                 |
|                 | 65                               | 85.9899            | 94.3675            | 84.2131            | 88.1902                 |
|                 | 85                               | 86.0285            | 92.2024            | 85.4510            | 87.8939                 |

92

93 The RSD values determined between days were all below the value recommended  
 94 by the Standard, which is a maximum of 10%, so the method can be considered accurate.  
 95 The accuracy varied from 75 a 99%, being within the specifications established by ICH.

96

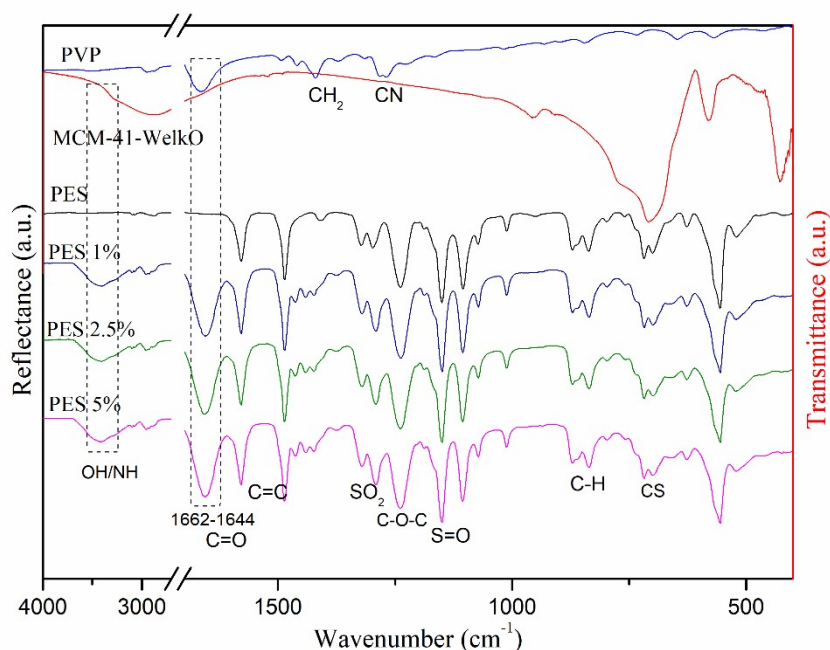

97

98 **Figure S1.** The FTIR spectra of PES/MCM-41-(*S,S*)-Welk-O<sup>®</sup>1 1% (w/w); PES/MCM-  
 99 41-(*S,S*)-Welk-O<sup>®</sup>1 2.5% (w/w); PES/MCM-41-(*S,S*)-Welk-O<sup>®</sup>1 5% (w/w); PES pure;  
 100 MCM-41-(*S,S*)-Welk-O<sup>®</sup>1 and PVP.

101 The bands at 1080 cm<sup>-1</sup> and 808 cm<sup>-1</sup> can be attributed to the asymmetric and  
 102 symmetrical stretching, respectively, of the vibration of  $\nu(\text{Si-O-Si})$ <sup>2</sup> and 466 cm<sup>-1</sup>  
 103 corresponds to angular deformation  $\nu(\text{Si-O-Si})$ <sup>3</sup>. The band in the region around 3473  
 104 cm<sup>-1</sup> corresponds to the stretching vibration of the  $\nu(\text{O-H})$  bond of H<sub>2</sub>O molecules  
 105 adsorbed on the silica matrix. At 1644 cm<sup>-1</sup> it corresponds to the absorption of the  
 106 carbonyl group of the secondary amide and the band in the region around 1550 cm<sup>-1</sup>  
 107 corresponds to the asymmetric axial deformation referring to the nitroaromatic groups (-  
 108 NO<sub>2</sub>) of the selector (*S,S*)-1-(3,5-dinitrobenzamido)-tetrahydrophenanthrene. This  
 109 proves the presence of the selector in the mesoporous material.

110

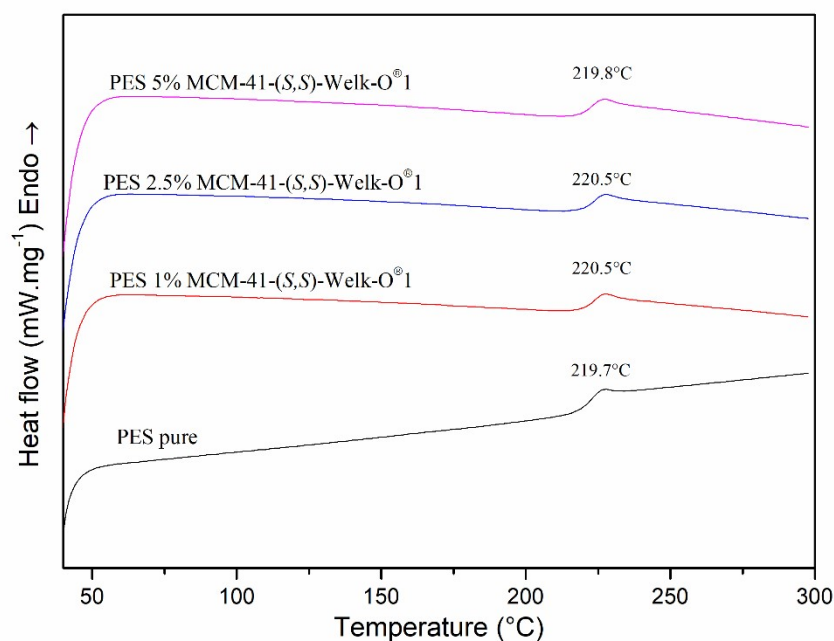

111  
 112 **Figure S2.** The DSC curves of PES/MCM-41-(S,S)-Welk-O®1 1% (w/w);  
 113 PES/MCM-41-(S,S)-Welk-O®1 2.5% (w/w); PES/MCM-41-(S,S)-Welk-O®1 5% (w/w);  
 114 PES pure.

115

116 It is observed that there was no variation in the  $T_g$  value for the pure PES  
 117 membranes and with different contents of MCM-41-(S,S)-Welk-O®1 mesoporous  
 118 material. Therefore, this event was observed in all of them with values ranging from 219.7  
 119 to 220.5 °C.

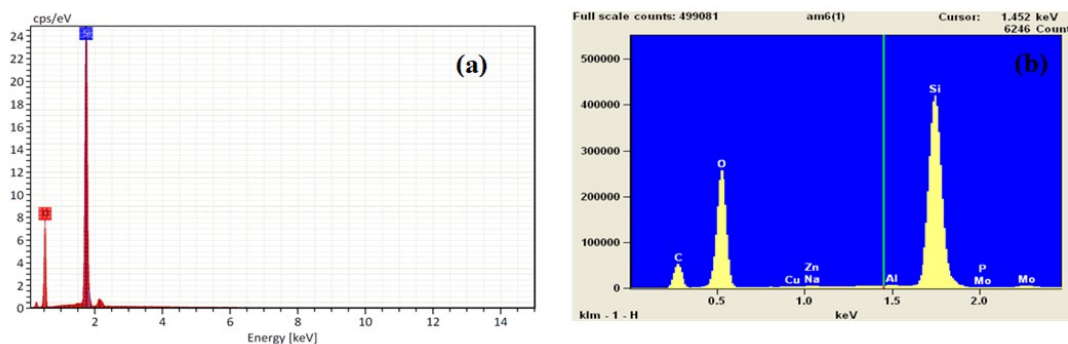

120

121 **Figure S3.** EDS images from SEM-EDS analyzes obtained of the mesoporous materials:  
 122 (a) MCM-41 and (c) MCM-41-(S,S)-Welk-O®1.

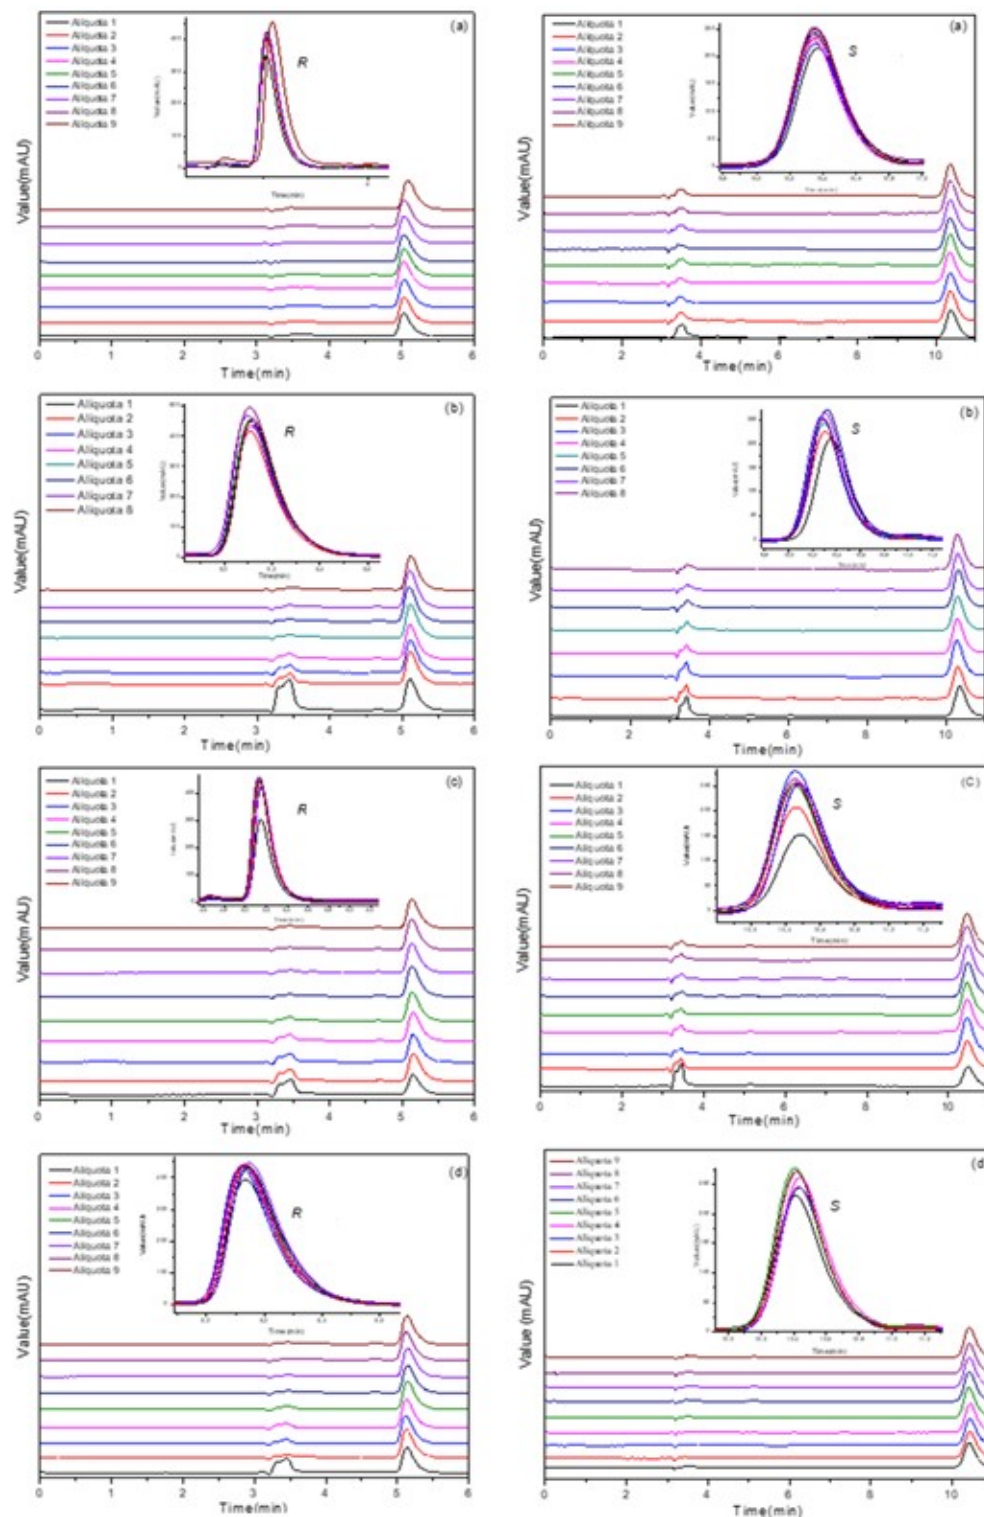

124

125 **Figure S4.** LC chromatograms of aliquots removed at certain time intervals during the  
 126 filtration of (*R*)- 6MeX and (*S*)- 6MeX through the membrane (a) PES pure, (b)  
 127 PES/MCM-41-(*S,S*)-Welk-O<sup>®</sup>1 1% (w/w), (c) PES/MCM-41-(*S,S*)-Welk-O<sup>®</sup>1 2.5%  
 128 (w/w) and (d) PES/MCM-41-(*S,S*)-Welk-O<sup>®</sup>1 5% (w/w). Column (*S,S*)-Welk-O<sup>®</sup>1 (25  
 129 cm, 4,6 mm i.d., 5 mm particle size, 100 Å pore size) from Regis<sup>®</sup> Technologies; Mobile  
 130 phase ACN:MeOH (50:50 v/v); flow rate: 1mL min<sup>-1</sup>; detection wavelength 254 nm.



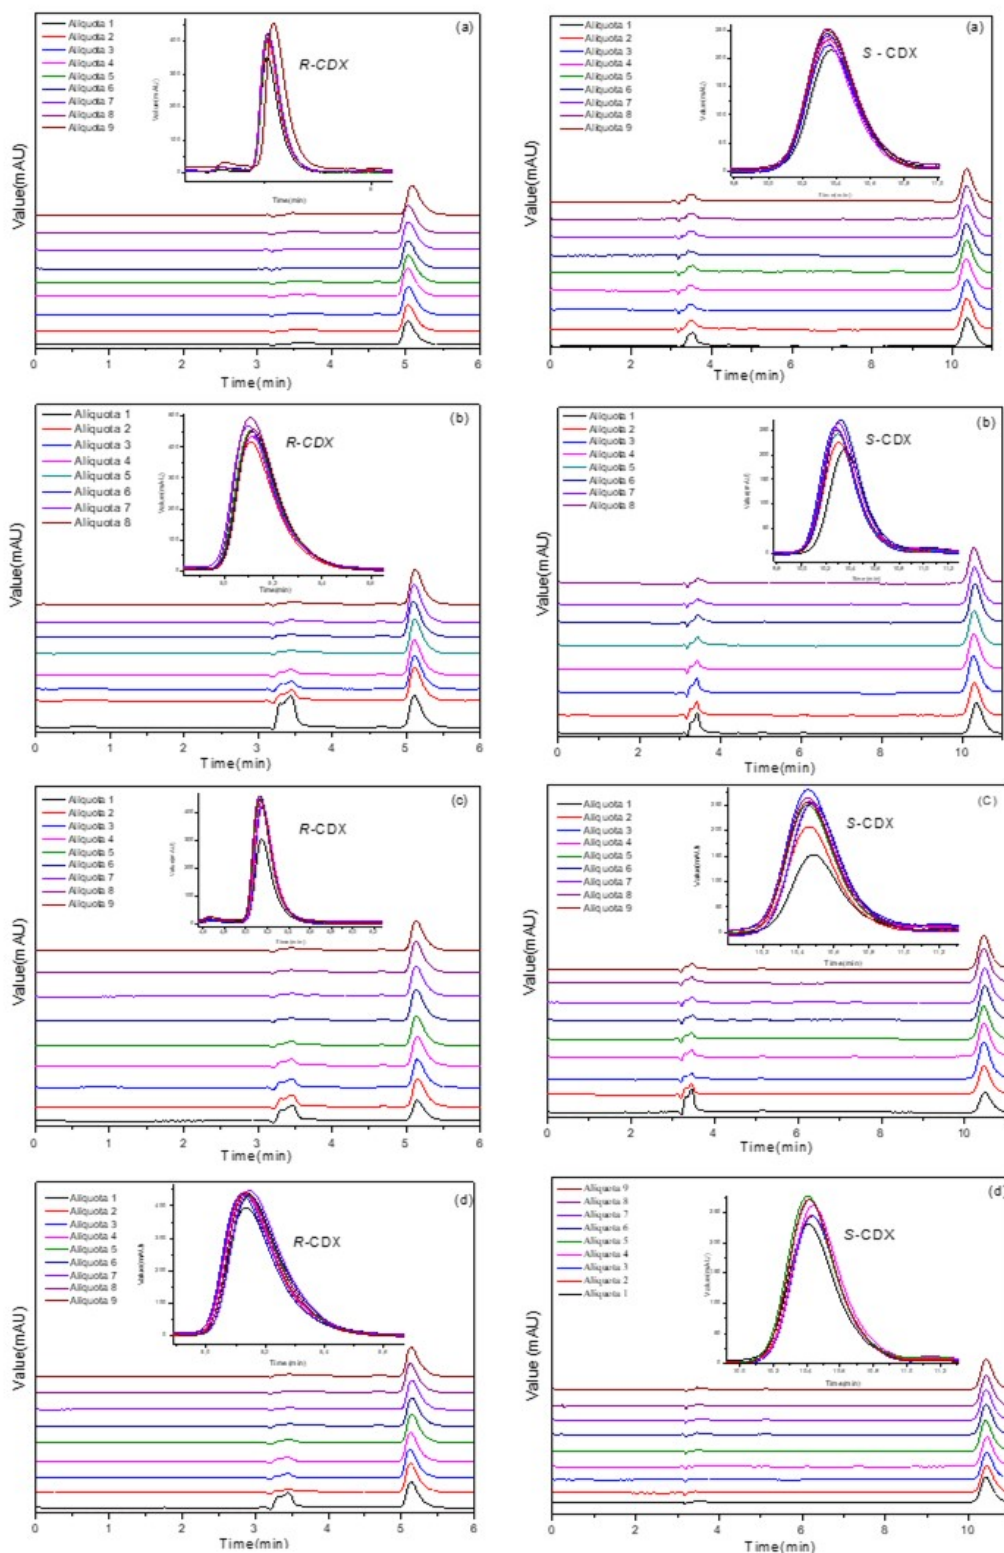

131

132 **Figure S5.** LC chromatograms of aliquots removed at certain time intervals during the  
 133 filtration of (*R*)-NPX and (*S*)-NPX through the membrane (a) PES pure, (b) PES/MCM-  
 134 41-(*S,S*)-Welk-O<sup>®</sup>1 1% (w/w), (c) PES/MCM-41-(*S,S*)-Welk-O<sup>®</sup>1 2.5% (w/w) and (d)  
 135 PES/MCM-41-(*S,S*)-Welk-O<sup>®</sup>1 5% (w/w). Column (*S,S*)-Welk-O<sup>®</sup>1 (25 cm, 4,6 mm  
 136 i.d., 5 mm particle size, 100 Å pore size) from Regis<sup>®</sup> Technologies; Mobile phase EtOH,  
 137 0.1%HAc; flow rate: 1mL min<sup>-1</sup>; detection wavelength 254 nm.

138

139

140

141
